# Supplementary material
Source: Springer Nature journal article supplement (https://www.springermedizin.de/resource/supplementary/12943_2013_1242_MOESM8_ESM.pdf/9553078)

**A)**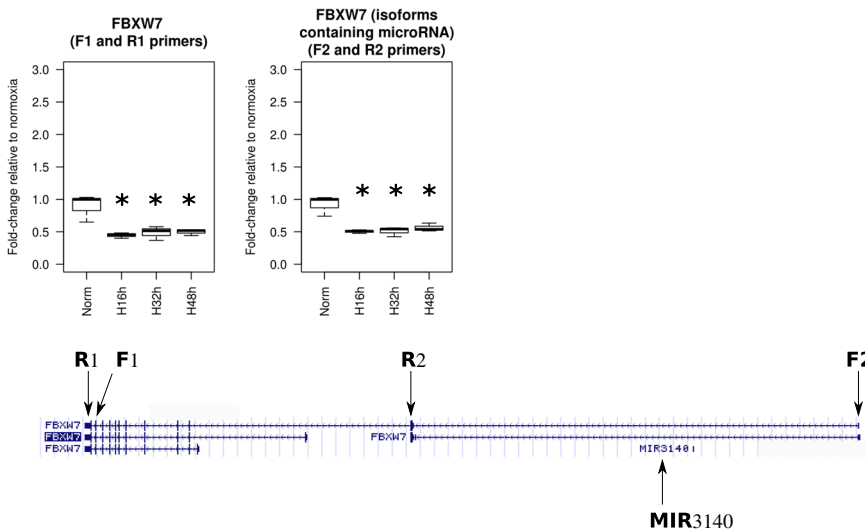**B)**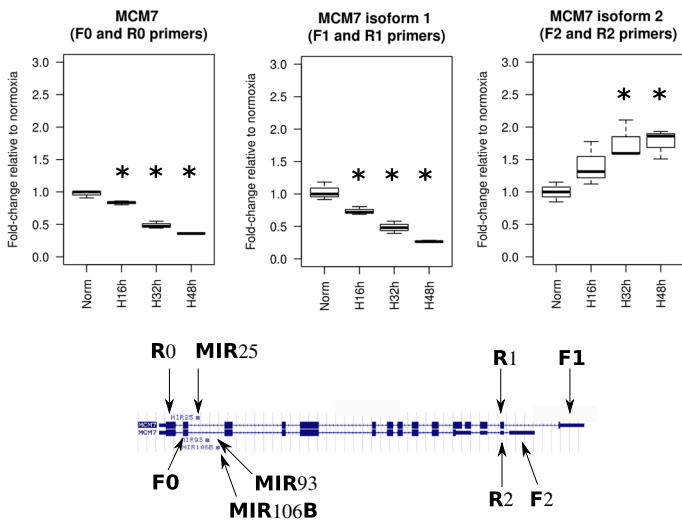

Supplement: MOESM8 [file 9553078]
